# Supplementary material for: Evaluation of Alternative-to-Gas Chlorination Disinfection Technologies in the Treatment of Maltese Potable Water
Source: MDPI journal article supplement (doi:10.3390/w15081450), 2023-04-07
Supplement: s1 [file s1]

Archive with 1 entries (1 files):
- water-2319877-supplementary.pdf
